# Supplementary material for: Imaging the nanoscale organization of peptidoglycan in living Lactococcus lactis cells
Source: PubMed Central journal article supplement — Nat Commun. 2010 Jun 15;1(3):1–8. doi: 10.1038/ncomms1027 (PMC2964452; doi:10.1038/ncomms1027), 2010-06-15
Supplement: ncomms1027-s1.pdf [file ncomms1027-s1.pdf]

## Supplementary information

### Imaging the nanoscale organization of peptidoglycan in living *Lactococcus lactis* cells

Guillaume Andre, Saulius Kulakauskas, Marie-Pierre Chapot-Chartier, Benjamine Navet,  
Marie Deghorain, Elvis Bernard, Pascal Hols, and Yves F. Dufrêne

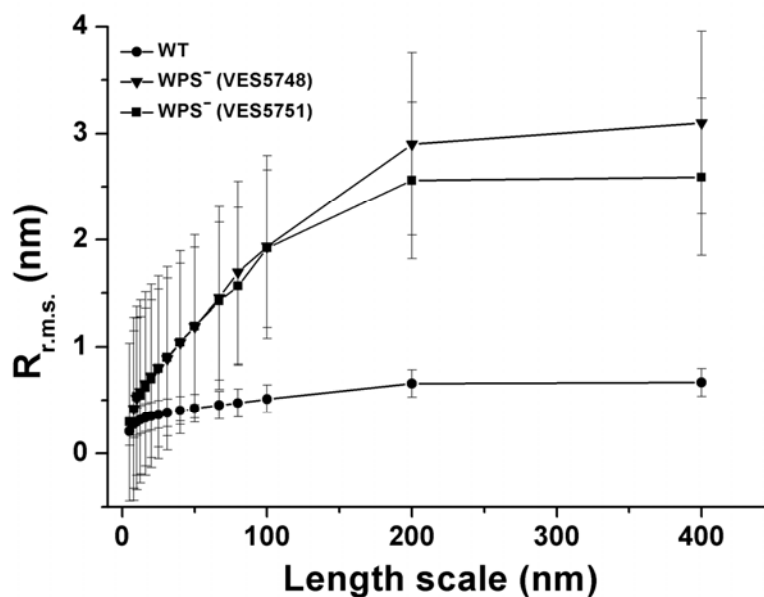

**Supplementary Figure S1. Statistical analysis of topographic images.** Variation of the root mean square roughness ( $R_{\text{rms}}$ ) constructed from the power spectral density (PSD) analysis as a function of the length scale, for *L. lactis* WT (●), VES5748 (▼) and VES5751 (■) WPS<sup>-</sup> mutants. Each data point represents the mean  $\pm$  standard deviation of four or five images obtained from independent cells.

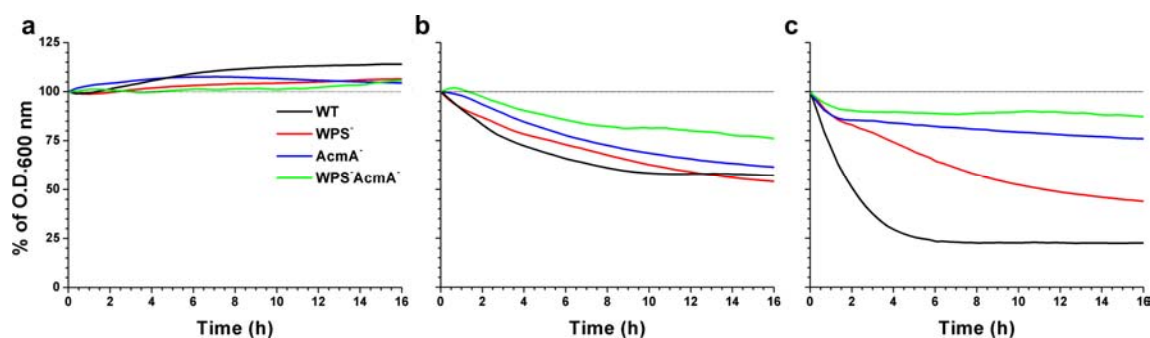

**Supplementary Figure S2. Autolysis assays.** Evolution with time of the cell population - i.e. optical density at 600 nm (O.D.<sub>600 nm</sub>) - of the wild-type strain, and of the VES5748 WPS<sup>-</sup>, AcmA<sup>-</sup> and VES1876 WPS<sup>-</sup>AcmA<sup>-</sup> mutants resuspended in three different buffers: sodium acetate buffer (150 mM, pH 5.2) which is known to limit hydrolysis<sup>46-48</sup> (a), phosphate buffer (50 mM, pH 7.0) which activates autolysins, thus hydrolysis<sup>46-48</sup> (b) and phosphate buffer (50 mM, pH 7.0) with Triton X-100 (0.05 %), which induces autolysis by membrane permeabilization<sup>49</sup> (c).

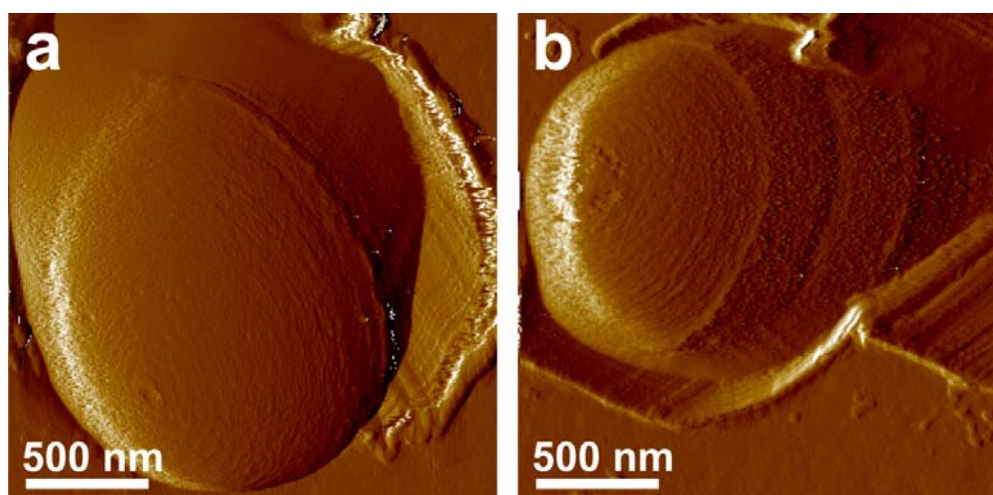

**Supplementary Figure S3. Ridges are observed in different environmental conditions.** AFM deflection images (applied force of 250 pN) of VES5748 WPS<sup>-</sup> cells incubated for 2 hrs in phosphate buffer (a) or in ultrapure water (b).

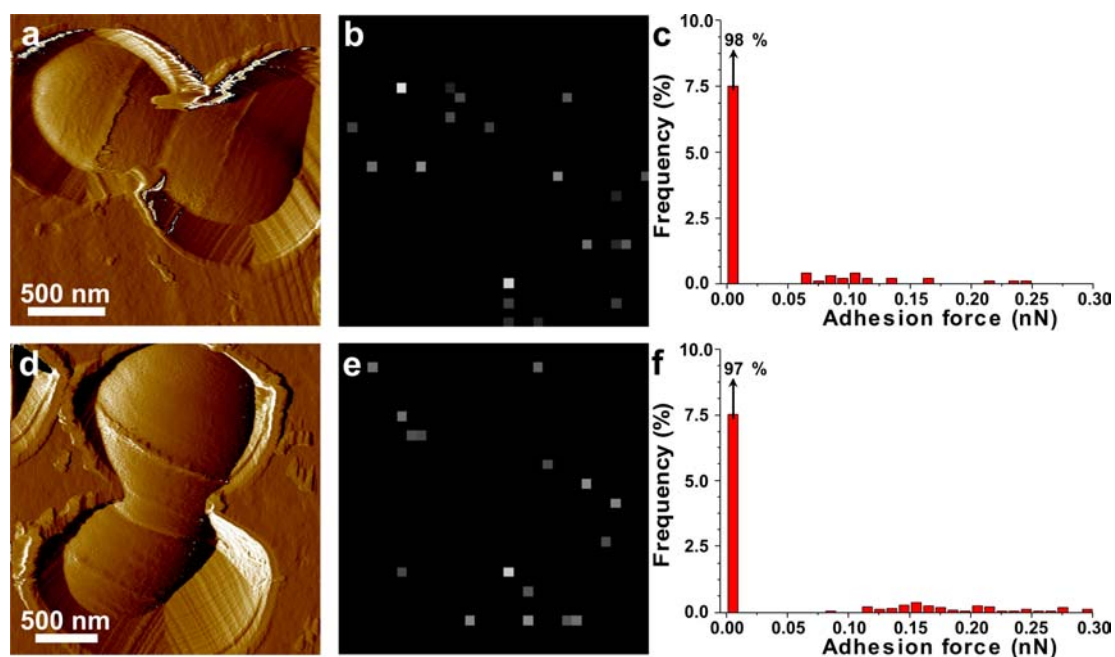

**Supplementary Figure S4. Control experiments demonstrating the specificity of the single-molecule recognition measurements.** (a) Deflection image, (b) adhesion force map (500 nm x 500 nm) and (c) adhesion histogram ( $n = 2048$  curves from 2 different maps) recorded with a silicon nitride tip on the VES5748 WPS<sup>-</sup> mutant. (d) Deflection image, (e) adhesion force map (500 nm x 500 nm) and (f) adhesion histogram ( $n = 4096$  curves from 4 different maps) recorded with a LysM tip on the VES5748 WPS<sup>-</sup> mutant, in the presence of  $10 \mu\text{g}\cdot\text{ml}^{-1}$  peptidoglycan.

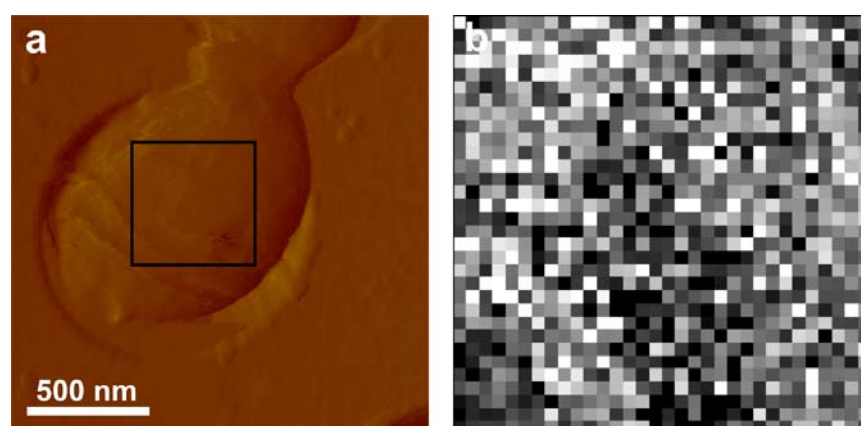

**Supplementary Figure S5. Single-molecule recognition imaging of trichloroacetic acid (TCA)-treated cells reveals dense and homogeneous peptidoglycan localization.** (a) AFM deflection image of a VES5748 WPS<sup>-</sup> mutant cell after treatment with TCA, documenting a smooth surface in which ridges are no longer visible. (b) Adhesion force map (500 nm x 500 nm) recorded with a LysM tip in the square area shown in the deflection image, using a maximum applied force of 250 pN.

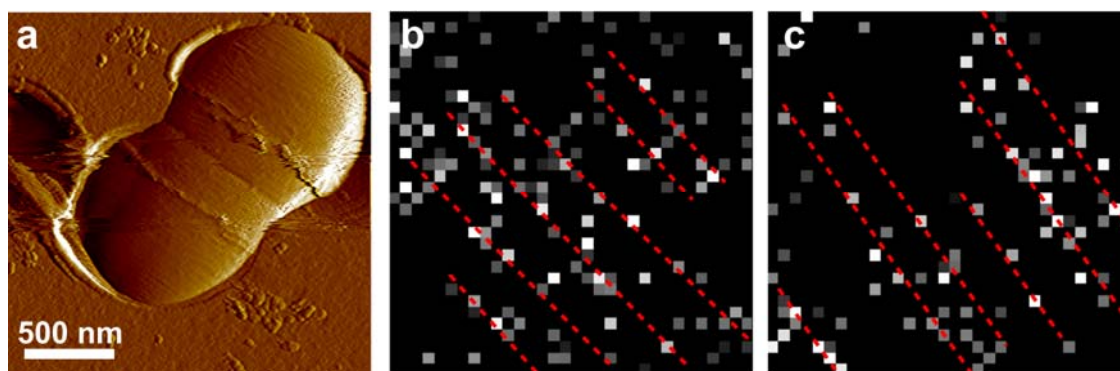

**Supplementary Figure S6. Recognition imaging of peptidoglycan residues using lectin tips.** (a) Deflection image recorded with a silicon nitride tip on the VES5748 WPS<sup>-</sup> mutant. (b, c) Adhesion force maps (500 nm x 500 nm) recorded on top of the cell with AFM tips functionalized with either wheat germ agglutinin (b) or *Griffonia simplicifolia* lectin II (c). Many of the detected residues (bright pixels) were arranged as lines running parallel to the short cell axis (red lines).

## References

46. Mou L., Sullivan J.J. & Jago G.R. Autolysis of *Streptococcus cremoris*. *J Dairy Res*, **46**, 275-282 (1976).
47. Chapot-Chartier M.P. Autolysins of lactic acid bacteria. *Lait*, **76**, 91-109 (1996).
48. Riepe H.R., Pillidge C.J., Gopal, P.K. & McKay L.L. Characterisation of the highly autolytic *Lactococcus lactis* subsp. *Cremoris* strain CO and 2250. *Environ Microbiol*, **63**, 3757-3763 (1997).
49. Veiga, P. *et al.* Identification of the asparagine synthase responsible for D-Asp amidation in the *Lactococcus lactis* peptidoglycan interpeptide crossbridge. *J Bacteriol* **191**, 3752-3757 (2009).
